# Supplementary material for: IL-18, but not IL-15, contributes to the IL-12-dependent induction of NK-cell effector functions by Leishmania infantum in vivo
Source: PubMed Central journal article supplement (PMC2909391; doi:10.1002/eji.200939988), 2010-03-08
Supplement: eji0040-1708-SD1.pdf [file eji0040-1708-SD1.pdf]

# European Journal of Immunology

Supporting Information

for

DOI 10.1002/eji.200939988

**IL-18, but not IL-15, contributes to the IL-12-dependent induction of NK-cell effector functions by *Leishmania infantum* in vivo**

Simone Haeberlein, Heidi Sebald, Christian Bogdan  
and Ulrike Schleicher

## Supplemental Figure S1

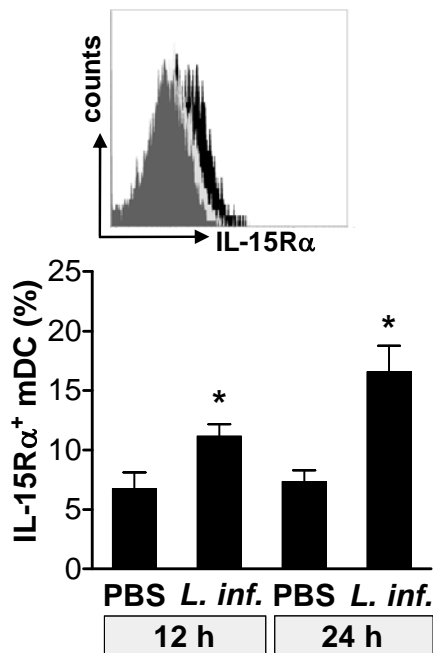**Up-regulation of IL-15R $\alpha$  on splenic mDC in *L. infantum*-infected mice.**

C57BL/6 WT or IL-15<sup>-/-</sup> mice were injected i.v. with  $1 \times 10^7$  *L. infantum* promastigotes or PBS and splenocytes were prepared 12 and 24 h p.i. IL-15R $\alpha$  surface expression of splenic DC (gated on CD11b<sup>int</sup>CD11c<sup>hi</sup> cells) was analysed by FACS after staining with biotinylated polyclonal goat anti-IL-15R $\alpha$  IgG and streptavidin-APC. As a control cells were stained with biotinylated normal goat IgG and streptavidin-APC. Mean  $\pm$  SEM of 4 independent experiments with 2 mice per group is given. The histogram overlay represents one example for the IL-15R $\alpha$  expression 24 h p.i. (black: *L. infantum* infection; light gray: PBS control; dark gray: control Ab staining). Significant differences by Mann-Whitney test between cells from infected and PBS-treated mice (\*,  $p < 0.05$ ) are indicated.

## Supplemental Figure S2

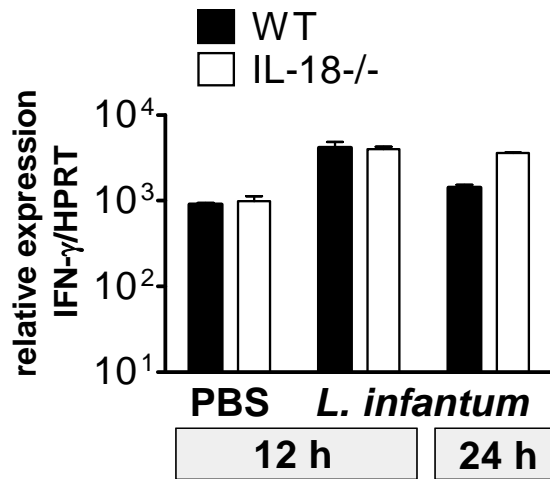

**IFN- $\gamma$  mRNA expression in NK cells of WT and IL-18<sup>-/-</sup> mice upon infection with *L. infantum*.** 1 × 10<sup>7</sup> *L. infantum* promastigotes or PBS were injected i.v. into C57BL/6 WT or IL-18<sup>-/-</sup> mice. NK1.1<sup>+</sup>CD3<sup>-</sup> NK cells were purified 12 and 24 h after treatment by magnetic bead separation and subsequent MoFlo sorting and total RNA was prepared. The IFN- $\gamma$  mRNA expression was analysed using quantitative RT-PCR and normalized to the endogenous control gene mHPRT-1. Mean  $\pm$  SEM of 1 representative out of 3 independent experiments with 2 mice per group is given.

## Supplemental Figure S3

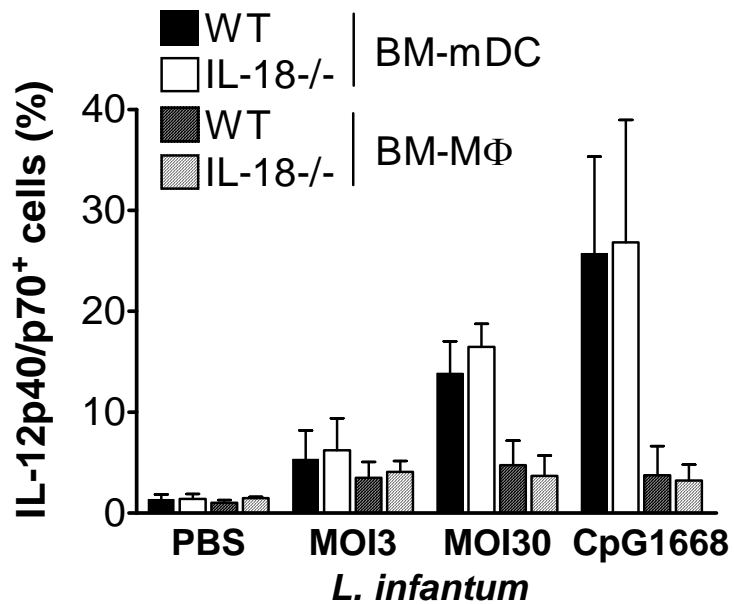

**No difference in the IL-12 production by BM-derived mDC and macrophages of WT and IL-18<sup>-/-</sup> mice after infection with *L. infantum* in vitro.** BM-derived mDC or macrophages were stimulated in vitro for 24 h with PBS, *L. infantum* promastigotes (MOI=3 or MOI=30) or CpG1668 (1  $\mu$ M) and intracellular IL-12p40/p70 protein expression of gated CD11b<sup>+</sup>CD11c<sup>+</sup> mDC or CD11b<sup>+</sup>F4/80<sup>+</sup> macrophages was measured. Mean  $\pm$  SEM of 3 independent experiments.

## Supplemental Figure S4

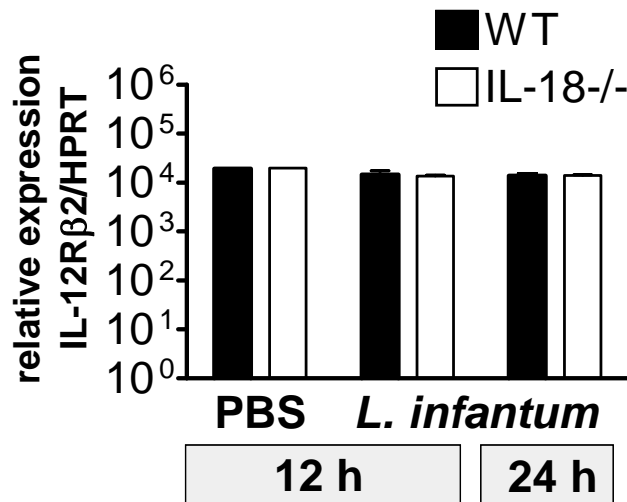

**IL-12Rβ2 mRNA expression in NK cells of WT and IL-18<sup>-/-</sup> mice after infection with *L. infantum*.**  $1 \times 10^7$  *L. infantum* promastigotes or PBS were injected i.v. into C57BL/6 WT or IL-18<sup>-/-</sup> mice and NK cells were purified as described in the legend to Fig. S2. The IL-12Rβ2 mRNA expression was analysed using quantitative RT-PCR and normalized to the endogenous control gene mHPRT-1. Mean  $\pm$  SEM of 1 representative out of 2 independent experiments with 2 mice per group is given.

## Supplemental Figure S5

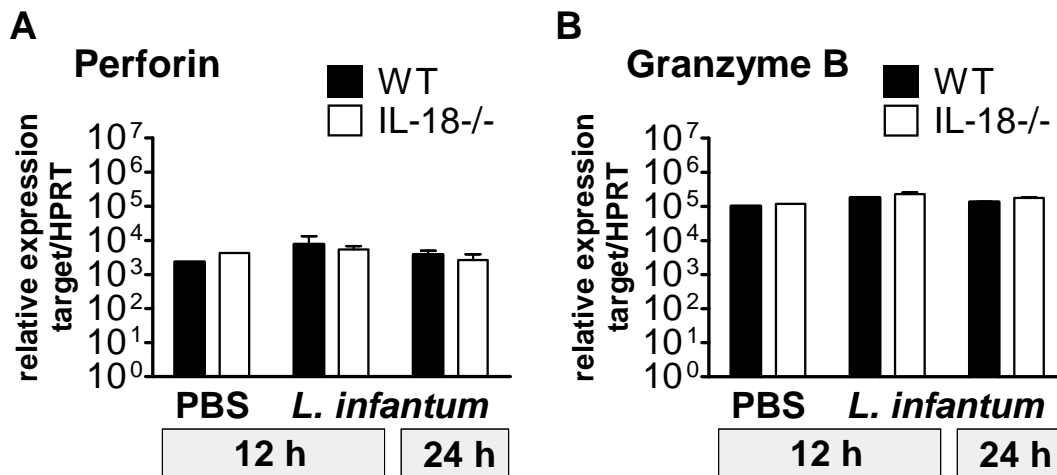

**Perforin and granzyme B mRNA expression in NK cells of WT and IL-18<sup>-/-</sup> mice after infection with *L. infantum*.**  $1 \times 10^7$  *L. infantum* promastigote parasites or PBS were injected i.v. into C57BL/6 WT or IL-18<sup>-/-</sup> mice and NK cells were purified as described in the legend to Fig. S2. The perforin (A) and gzm B (B) mRNA expression were analysed using quantitative RT-PCR and normalized to the endogenous control gene mHPRT-1. Mean  $\pm$  SEM of 1 representative out of 2 independent experiments with 2 mice per group is given.
